# Supplementary material for: Coronavirus Disease 2019 (COVID-19): A Modeling Study of Factors Driving Variation in Case Fatality Rate by Country
Source: MDPI journal article supplement (doi:10.3390/ijerph17218189), 2020-11-05
Supplement: s1 [file s1]

**Table S1** 24 country-level risk factors with potential influence on COVID-19 case fatality rates.

| Variable                              | Variable Description                                                                   | Source       |
|---------------------------------------|----------------------------------------------------------------------------------------|--------------|
| Population                            | Country population as of 2020                                                          | (1)          |
| Population density                    | Population density as of 2020                                                          | (2)          |
| Percent population over 70            | Percent of population over 70 years of age                                             | [1]          |
| Total Cases <sup>a</sup>              | Total confirmed COVID-19 cases as of 2020                                              | (1)          |
| Total deaths <sup>a</sup>             | Total confirmed COVID-19 deaths as of 2020                                             | (1)          |
| CFR <sup>a</sup>                      | Case fatality ratio calculated from total cases and total deaths                       | (1)          |
| Gross Domestic Product                | Country GDP as of 2017 in US dollars                                                   | (3)          |
| GDP per capita                        | Country GDP per person as of 2017 in US dollars                                        | (3)          |
| Healthcare expenditure per capita     | Healthcare expenditure per person as of 2017 in US dollars                             | (2)          |
| Scientific production                 | Scientific Production as of 2016 in US dollars                                         | (2)          |
| Hospital beds per 1000                | Hospital beds per 1000 people                                                          | (2)          |
| Physicians per 1000                   | Physicians per 1000 people                                                             | (2)          |
| General mortality rate per 100000     | Country's general mortality rate per 100000                                            | (2)          |
| Life expectancy                       | _(mean/median) life expectancy as of 2020                                              | (2)          |
| CT scanners per 1 million             | CT scanners per 1 million people as of 2018                                            | (4)          |
| Radiology Specialists                 | Number of radiologists per country as of 2008                                          | (5)          |
| Radiologists per 1 million            | Radiologists per 1 million people calculated from population and radiology specialists | (1, 5)       |
| Total tests <sup>b</sup>              | Total tests performed for COVID in a given country                                     | (1)          |
| Tests per thousand <sup>b</sup>       | Number of COVID tests in a given country per 1000 people                               | (1)          |
| Median Age                            | Median Age of country                                                                  | (6)          |
| Date of 100th case                    | Date of 100th confirmed COVID-19 case                                                  | (1)          |
| Date of first government <sup>c</sup> | Date of first government intervention on its citizenry                                 | <sup>d</sup> |
| Days from 100th case to intervention  | Number of days from date of 100th case to date of first intervention.                  | (1)          |
| Air travel activity                   | Air travel in 1000s of passengers carried over 2018.                                   | (7)          |

|                          |                                                                                               |     |
|--------------------------|-----------------------------------------------------------------------------------------------|-----|
| Education                | Percent of a population aged 25 to 64 with at least a high-school level degree or equivalent. | (4) |
| Literacy Rate            | Percent of a population which is literate.                                                    | (8) |
| Obesity Prevalence       | Percent of a population with a BMI >30 in 2017.                                               | (9) |
| Prevalence Daily smoking | Prevalence of daily smoked tobacco use in a population in 2012.                               | (9) |
| Prevalence tobacco use   | Prevalence of any tobacco use in a population in 2017.                                        | (9) |
| HIV prevalence           | Prevalence of HIV in a population in 2017                                                     | (9) |
| COPD                     | Prevalence of COPD in a population in 2017                                                    | (9) |
| Air pollution            | Mean annual exposure (micrograms per cubic meter) in 2017.                                    | (9) |

<sup>a</sup> Current as of April 22, 2020.

<sup>b</sup> Current as of April 21, 2020.

<sup>c</sup> Government responses have varied across countries. For purposes of this study, we defined this intervention as the first date when recommendations or legislation was passed limiting gathering size, closing non-essential business, or encouraging social distancing. School closures and international travel bans were not considered.

<sup>d</sup> Dates taken from various news sources and compiled in supplemental data (**Table S2**).

**Table S2** Date of first government intervention per aggregation of secondary news sources as indicated.<sup>a</sup>

| Country        | Date      | Source                                                        |
|----------------|-----------|---------------------------------------------------------------|
| Belgium        | 3/18/2020 | Belgium Federal Authorities Coronavirus Info(10)              |
| Brazil         | 3/21/2020 | Reuters(11)                                                   |
| France         | 3/16/2020 | The Independent(12)                                           |
| Germany        | 3/16/2020 | Bayerischer Rundfunk (Bavarian Broadcasting)(13)              |
| Iran           | 3/24/2020 | Reuters(14)                                                   |
| Italy          | 3/9/2020  | Wall Street Journal(15)                                       |
| Netherlands    | 3/15/2020 | NOS (Dutch Broadcast Foundation)(16)                          |
| Spain          | 3/28/2020 | The Guardian(17)                                              |
| United Kingdom | 3/20/2020 | NBC(18)                                                       |
| United States  | 3/21/2020 | Wall Street Journal(19)                                       |
| Australia      | 3/23/2020 | Sydney Morning Herald(20)                                     |
| Austria        | 3/16/2020 | ORF(21)                                                       |
| Canada         | 3/23/2020 | CTV news(22)                                                  |
| Chile          | 3/22/2020 | National Post(23)                                             |
| China          | 1/21/2020 | South China Morning Post(24)                                  |
| Czech Republic | 3/14/2020 | Government of the Czech Republic(25)                          |
| Denmark        | 3/13/2020 | TV2(26)                                                       |
| Ecuador        | 3/16/2020 | Oxford Government Response Tracker - Ecuador(27) <sup>a</sup> |
| India          | 3/17/2020 | Live Mint (28)                                                |
| Indonesia      | 4/10/2020 | Detik News(29)                                                |
| Ireland        | 3/27/2020 | Government of Ireland (30)                                    |
| Israel         | 3/11/2020 | Jerusalem Post (31)                                           |
| Japan          | 3/26/2020 | The Asahi Shimbun (32)                                        |
| Malaysia       | 3/18/2020 | Malay Mail (33)                                               |
| Mexico         | 3/23/2020 | UNO TV (34)                                                   |
| Norway         | 3/12/2020 | NRK (35)                                                      |

|                      |           |                                                 |
|----------------------|-----------|-------------------------------------------------|
| Pakistan             | 3/22/2020 | Radio Pakistan(36)                              |
| Peru                 | 3/15/2020 | Gestión (37)                                    |
| Philippines          | 3/16/2020 | GMA News Online (38)                            |
| Poland               | 3/24/2020 | TVN(39)                                         |
| Portugal             | 3/19/2020 | The Portugal News(40)                           |
| Romania              | 3/25/2020 | Romania Ministry of Health (41)                 |
| Russian Federation   | 3/24/2020 | Government of the Russian Federation(42)        |
| Saudi Arabia         | 3/15/2020 | Al Arabiya(43)                                  |
| South Korea          | 2/24/2020 | New York Times(44)                              |
| Sweden               | 3/10/2020 | Public Health Agency of Sweden(45)              |
| Switzerland          | 3/16/2020 | Switzerland Federal Office of Public Health(46) |
| Turkey               | 4/11/2020 | Garda(47)                                       |
| United Arab Emirates | 3/26/2020 | Al Arabiya(48)                                  |

<sup>a</sup>Obtained by searching for first date of movement restrictions between dates March 1, 2020 and March 31, 2020.

## References:

1. M. Roser, H. Ritchie, E. Ortiz-Ospina, Coronavirus Disease (COVID-19) – Statistics and Research (2020) (April 15, 2020).
2. The World Bank, World Bank Open Data (April 25, 2020).
3. M. Roser, Economic Growth. *Our World Data* (2013) (April 29, 2020).
4. Organisation for Economic, Co-operation and Development, OECD data. *theOECD* (April 25, 2020).
5. Y. Nakajima, K. Yamada, K. Imamura, K. Kobayashi, Radiologist supply and workload: international comparison: Working Group of Japanese College of Radiology. *Radiat. Med.* **26**, 455–465 (2008).
6. , World Population Prospects - Population Division - United Nations (April 29, 2020).
7. L. Martelletti, P. Martelletti, Air Pollution and the Novel Covid-19 Disease: a Putative Disease Risk Factor. *SN Compr Clin Med*, 1–5 (2020).
8. M. Roser, E. Ortiz-Ospina, Literacy. *Our World Data* (2016) (April 29, 2020).
9. , Global Health Data Exchange | GHDx (April 29, 2020).
10. , Coronavirus : Phase 2 maintained, transition to the federal phase and additional measures | Coronavirus COVID-19 (April 30, 2020).
11. , Brazil's Sao Paulo to get two-week coronavirus shutdown, Bolsonaro blasts "hysteria." *Reuters* (2020) (April 29, 2020).
12. , Coronavirus: France imposes 15-day lockdown and mobilises 100,000 police to enforce restrictions | The Independent (April 29, 2020).
13. , Katastrophenfall: Diese Regeln gelten in Bayern. *BR24* (2020) (April 29, 2020).
14. , Half of Iranian government employees to work remotely amid coronavirus - Rouhani. *Reuters* (2020) (April 29, 2020).
15. E. S. and G. Legorano, As Virus Spreads, Italy Locks Down Country. *Wall Str. J.* (2020) (April 29, 2020).
16. , De uitzending van 15 maart: Verregaande maatregelen in strijd tegen corona (April 30, 2020).
17. , Spain orders non-essential workers stay home for two weeks | World news | The Guardian (April 29, 2020).
18. S. Meredith, UK PM Boris Johnson announces nationwide lockdown measures, telling cafes, pubs and restaurants to close. *CNBC* (2020) (April 29, 2020).
19. , A Guide to State Coronavirus Reopenings and Lockdowns - *WSJ* (April 29, 2020).
20. , Drastic bans on pubs, gyms and cinemas in bid to stop coronavirus (April 29, 2020).

21. O. at/Agenturen red, Ausgangsbeschränkungen: Was nun erlaubt ist und was nicht. *news.ORF.at* (2020) (April 29, 2020).
22. , Feds launch ad campaign urging social distancing, hygiene during COVID-19 crisis. *Coronavirus* (2020) (April 29, 2020).
23. , Chile announces nationwide nightly curfew, coronavirus cases hit 632 | *National Post* (April 29, 2020).
24. , China's credibility on the line as it tries to dispels fears it will cover up spread of Wuhan virus | *South China Morning Post* (April 29, 2020).
25. , Vláda rozhodla o uzavření všech obchodů kromě prodejen potravin, lékáren, drogerií, čerpacích stanic a některých dalších (April 29, 2020).
26. , Danmark lukker ned: Her er regeringens nye tiltag - TV 2. *nyheder.tv2.dk* (2020) (April 29, 2020).
27. , OxCGRT (April 29, 2020).
28. , Govt calls for social distancing as confirmed coronavirus cases rise to 124 (April 29, 2020).
29. A. Ikhsanudin, DKI Jakarta Akan Perpanjang Masa PSBB. *detiknews* (April 29, 2020).
30. , Gov.ie - Public health measures in place until 5 May to prevent spreading COVID-19 (April 29, 2020).
31. , Israel limits gatherings to 100 people as coronavirus cases climb to 97 - *The Jerusalem Post* (April 29, 2020).
32. , Prefectures urging residents to avoid travel to virus-hit Tokyo. *Asahi Shimbun* (April 29, 2020).
33. , PM: Malaysia under movement control order from Wed until March 31, all shops closed except for essential services | *Malaysia | Malay Mail* (April 29, 2020).
34. , México inicia fase 2 por coronavirus; toma estas medidas (2020) (April 29, 2020).
35. P. Kalajdzic, Alle utdanningsinstitusjoner stenges – flere arrangementer og virksomheter får forbud. *NRK* (2020) (April 29, 2020).
36. , GB Govt decides to observe lockdown for indefinite period (April 29, 2020).
37. R. Gestión, Coronavirus en Perú: Gobierno anuncia cuarentena obligatoria por 15 días por coronavirus. *Gestión* (2020) (April 29, 2020).
38. , Duterte orders Luzon-wide "enhanced community quarantine" (April 29, 2020).
39. , Koronawirus w Polsce. Zakaz wychodzenia z domu bez konkretnego powodu i nowe obostrzenia od 25 marca - *TVN24* (April 29, 2020).
40. , State of emergency explained (April 29, 2020).
41. , Buletin informativ 25.03.2020 – Ministerul Sănătății (April 29, 2020).

42. , О решениях по итогам заседания оперативного штаба по предупреждению завоза и распространения новой коронавирусной инфекции на территории Российской Федерации (April 29, 2020).
43. , Saudi Arabia closes commercial centers and restaurants to reduce Corona (April 29, 2020).
44. M. Fisher, C. Sang-Hun, How South Korea Flattened the Curve. *N. Y. Times* (2020) (April 29, 2020).
45. , Flera tecken på samhällsspridning av covid-19 i Sverige — Folkhälsomyndigheten (April 29, 2020).
46. F. O. of P. H. FOPH, New coronavirus: Measures, ordinance and explanations (April 30, 2020).
47. , Turkey: Authorities to implement 48-hour lockdown in 31 cities as of April 11 /update 14. *GardaWorld* (April 29, 2020).
48. , Coronavirus: UAE to shut public transport, restrict movement from March 26-29 | Al Arabiya English (April 29, 2020).
